# Supplementary material
Source: PubMed Central journal article supplement (PMC8315623)
Supplement: mmc7.pdf [file mmc7.pdf]

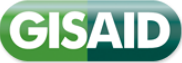

We gratefully acknowledge the following Authors from the Originating laboratories responsible for obtaining the specimens, as well as the Submitting laboratories where the genome data were generated and shared via GISAID, on which this research is based.

All Submitters of data may be contacted directly via [www.gisaid.org](http://www.gisaid.org)

| Accession ID                                                                                                                         | Originating Laboratory                                                                   | Submitting Laboratory                                                                    | Authors                                                                                                                                                                                                                                                                         |
|--------------------------------------------------------------------------------------------------------------------------------------|------------------------------------------------------------------------------------------|------------------------------------------------------------------------------------------|---------------------------------------------------------------------------------------------------------------------------------------------------------------------------------------------------------------------------------------------------------------------------------|
| EPI_ISL_610201, EPI_ISL_610203, EPI_ISL_610204,<br>EPI_ISL_610214, EPI_ISL_610215, EPI_ISL_610222,<br>EPI_ISL_610223, EPI_ISL_610224 | Department of Health Technology and Informatics, The<br>Hong Kong Polytechnic University | Department of Health Technology and Informatics, The<br>Hong Kong Polytechnic University | Siu,G.K.-H., Lee,L.-K., Leung,K.S.-S., Leung,J.S.-L., Ng,T.T.-L., Chan,C.T.-M., Tam,K.K.-G., Lao,H.-Y., Wu,A.K.-L., Yau,M.C.-Y., Lai,Y.W.-M.,<br>Fung,K.S.-C., Chau,S.K.-Y., Wong,B.K.-C., To,W.-K., Luk,K., Ho,A.Y.-M., Que,T.-L., Yip,K.-T., Yam,W.C., Shum,D.H.-K., Yip,S.P. |
